# Supplementary material for: Confirming a critical role for death receptor 5 and caspase-8 in apoptosis induction by endoplasmic reticulum stress
Source: PubMed Central journal article supplement (PMC6113221; doi:10.1038/s41418-018-0155-y), 2018-07-10
Supplement: 41418_2018_155_MOESM3_ESM.pdf [file 41418_2018_155_MOESM3_ESM.pdf]

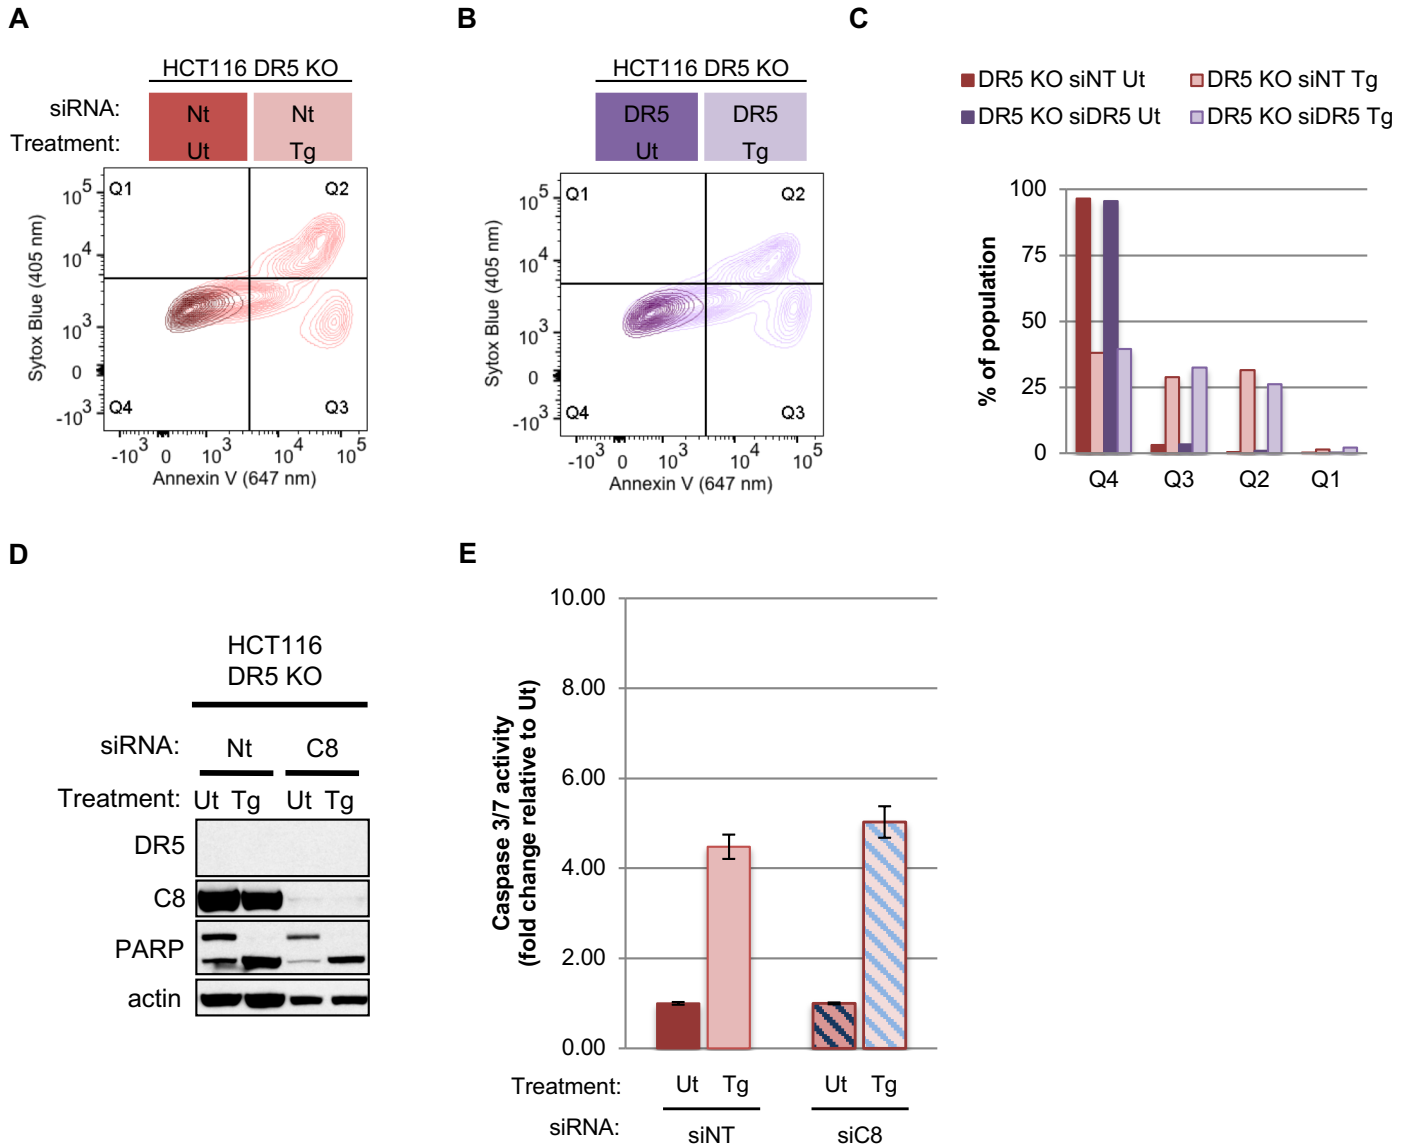

**Figure S3: Apoptosis in DR5 KO cells occurs independently of caspase-8.**

Apoptosis was measured via Annexin V-Sytox Blue staining for HCT116 DR5 KO cells transfected with siRNA against DR5 or non-targeting control (Nt) for 48 hours and treated with 100 nM Tg or vehicle alone (Ut) for 24 hours (A-C). DR5 KO cells transfected with siRNA against caspase-8 were analyzed for PARP cleavage via Western blotting (D) and for caspase-3/7 activity via GLO assay (E, mean  $\pm$  standard deviation for  $n = 3$  biological replicates).
